# Supplementary material
Source: PubMed Central journal article supplement (PMC8357281)
Supplement: aem.00473-21-s0001.pdf [file aem.00473-21-s0001.pdf]

## Supplemental Material

# The Heat Shock Repressor HspR Directly Controls Avermectin Production, Morphological Development, and H<sub>2</sub>O<sub>2</sub> Stress Response in *Streptomyces avermitilis*

Xiaorui Lu<sup>#</sup>, Qian Wang<sup>#</sup>, Mengyao Yang, Zhi Chen, Jilun Li, and Ying Wen\*

State Key Laboratory of Agrobiotechnology and College of Biological Sciences, China Agricultural University, Beijing, China.

# These two authors made equal contributions to the study.

\*Corresponding author: Ying Wen; e-mail: wen@cau.edu.cn, phone: +86-10-62732715.

**Running title:** HspR function in *Streptomyces avermitilis*

**FIG S1**

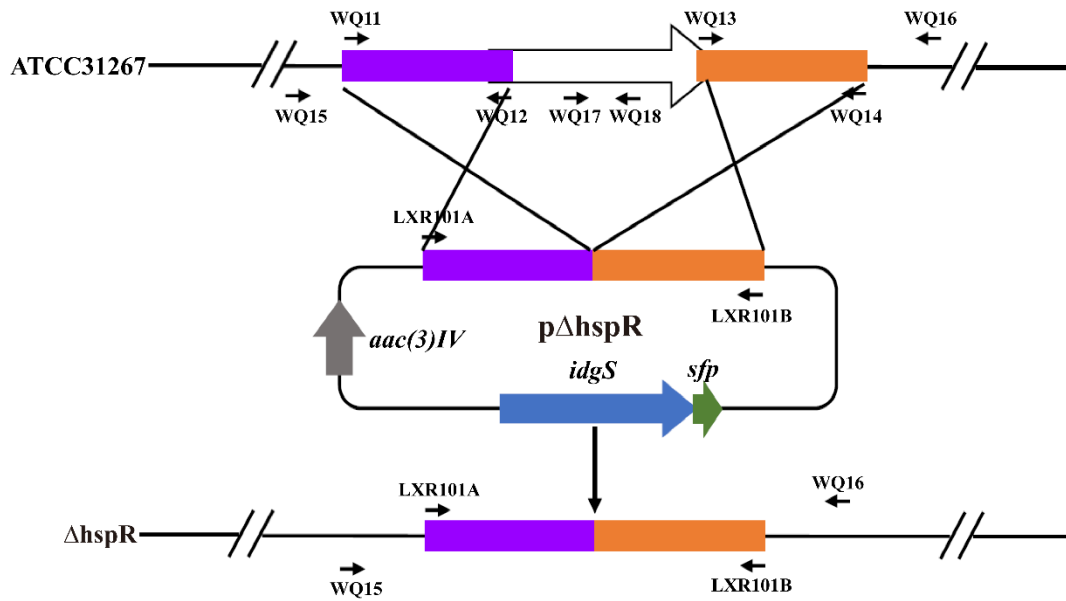

**FIG S1** Method for *hspR* deletion (schematic). Large arrows: genes and their directions. Small arrows: positions of primers used for amplifying exchange regions and confirming gene deletions. Blocks: homologous exchange regions used for gene deletion.

FIG S2

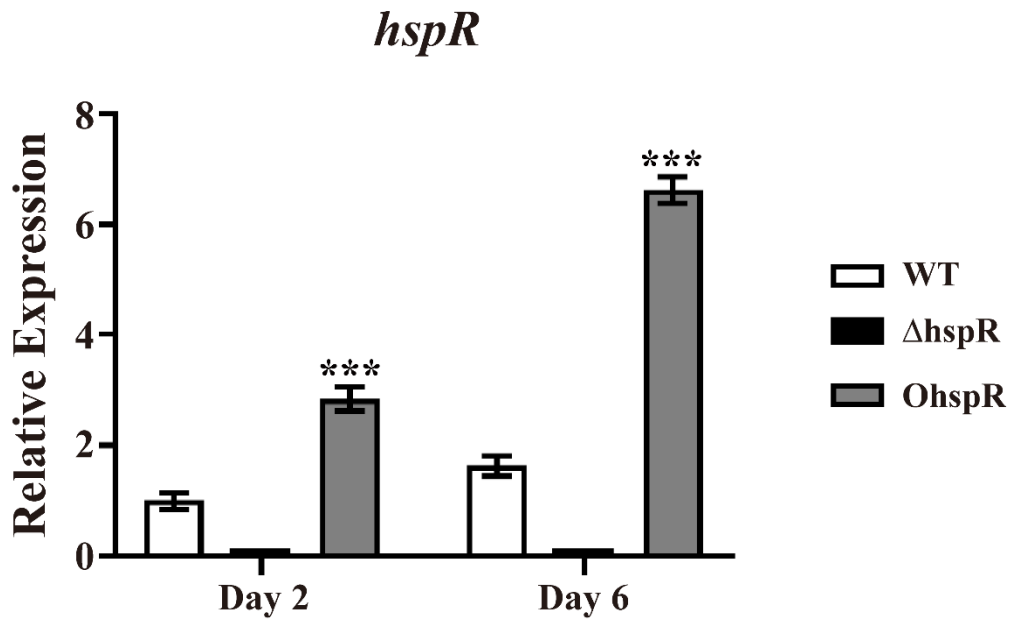

FIG S2 RT-qPCR analysis of *hspR* in WT,  $\Delta$ hspR, and OhspR grown in FM-I for 2 or 6 days.

Transcription level was calculated relative to WT level on day 2 (set to 1). Error bars: SD for three replicates. \*\*\*,  $p < 0.001$  ( $t$ -test).

**FIG S3**

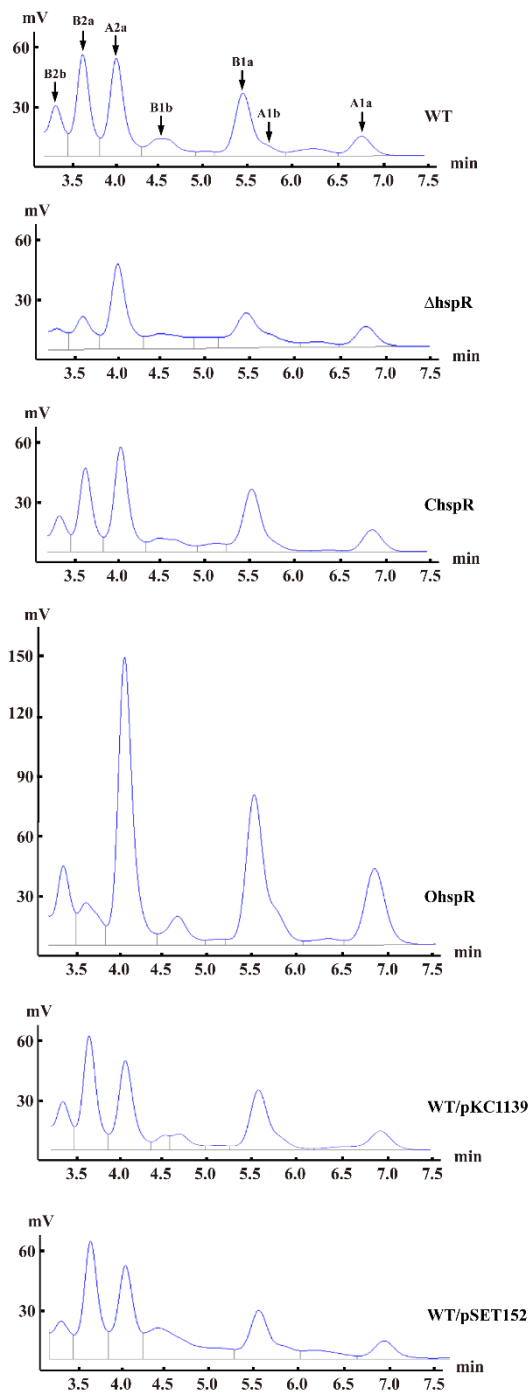

**FIG S3** HPLC analysis of avermectin profiles in WT,  $\Delta$ hspR, ChspR, OhspR, and control strains (WT/pKC1139, WT/pSET152) after 10-day culture in FM-I.

**FIG S4**

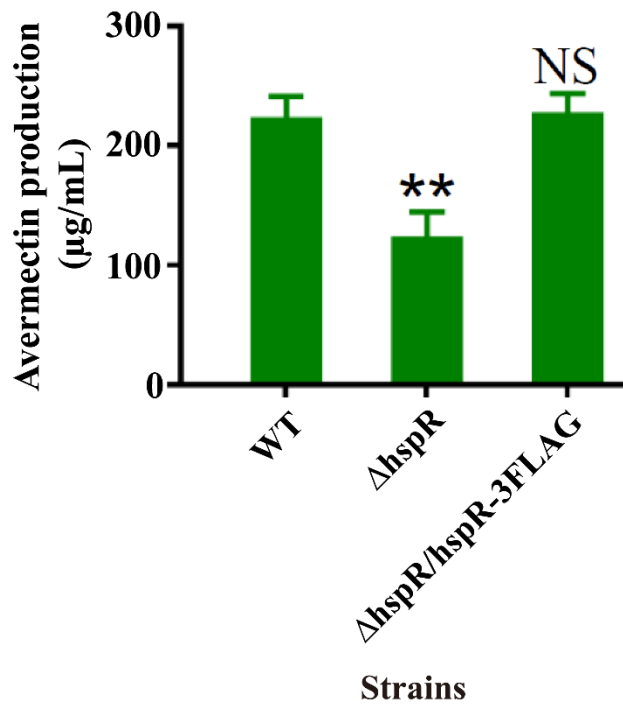

**FIG S4** Avermectin yield in *S. avermitilis* WT, ΔhspR, and ΔhspR/hspR-3FLAG (ΔhspR carrying pSET152-hspR-3FLAG) cultured in FM-I for 10 days. Error bars: SD for three replicates. NS, not significant; \*\*,  $p < 0.01$  (*t*-test).

**FIG S5**

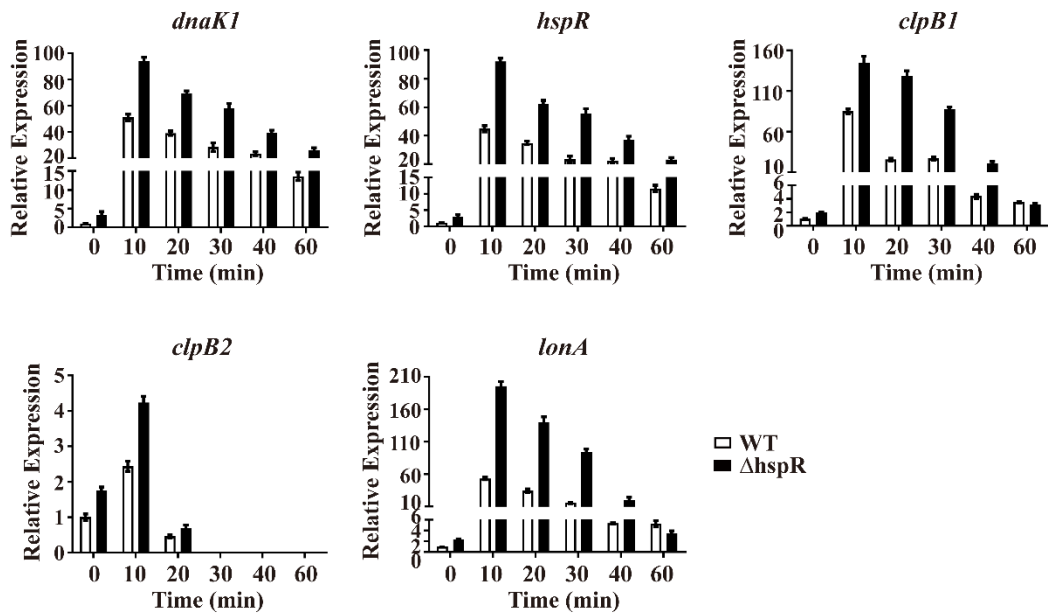

**FIG S5** Induction of five HSGs by heat treatment (50°C) in WT and  $\Delta$ *hspR* grown in FM-II. For each gene, transcription level in WT before temperature rise (0 min) was set to 1. Error bars: SD for three replicates.

**FIG S6**

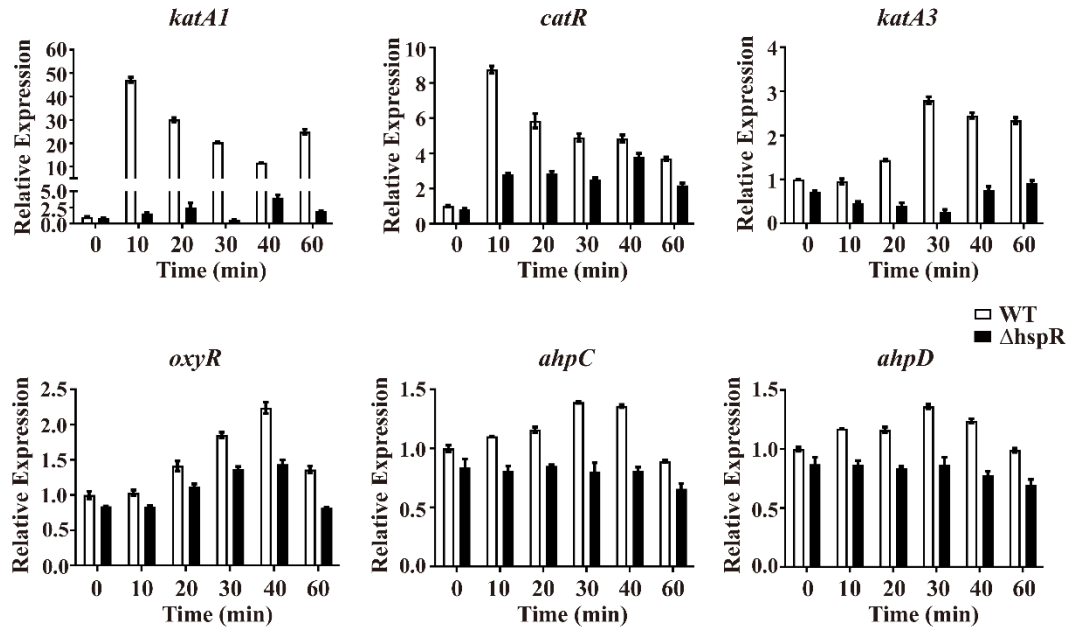

**FIG S6** Induction of six H<sub>2</sub>O<sub>2</sub> stress-related genes by 0.6 mM H<sub>2</sub>O<sub>2</sub> in WT and  $\Delta$ *hspR* grown in FM-II. For each gene, transcription level in WT before H<sub>2</sub>O<sub>2</sub> treatment (0 min) was set to 1. Error bars: SD for three replicates.

**FIG S7**

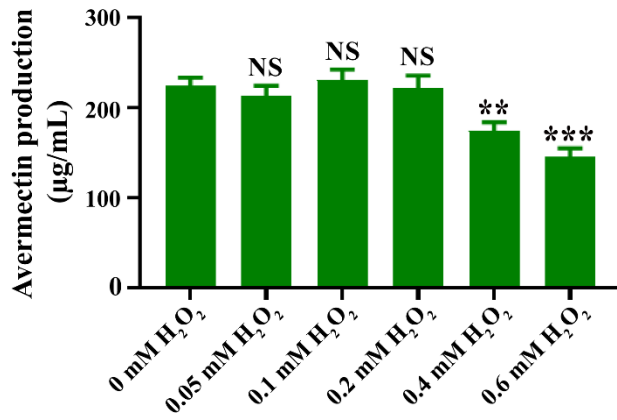

**FIG S7** Avermectin yield in WT strain after 10-day culture in FM-I containing H<sub>2</sub>O<sub>2</sub> at indicated concentrations. Error bars: SD for three replicates. NS, not significant; \*\*,  $p < 0.01$ ; \*\*\*,  $p < 0.001$  for comparison with control (no H<sub>2</sub>O<sub>2</sub> addition) ( $t$ -test).



**TABLE S1** Putative targets of HspR

| #                                                          | Accession number | Gene         | Function                                               | Score |
|------------------------------------------------------------|------------------|--------------|--------------------------------------------------------|-------|
| <b>Regulatory function (23)</b>                            |                  |              |                                                        |       |
| 1                                                          | SAV_223          |              | putative DNA-binding protein                           | 8.4   |
| 2                                                          | SAV_343          |              | putative regulatory protein                            | 10.2  |
| 3                                                          | SAV_554          |              | putative LacI-family transcriptional regulator         | 14.1  |
| 4                                                          | SAV_570          | <i>ssgY</i>  | putative cell division regulatory protein              | 8.8   |
| 5                                                          | SAV_711          |              | putative transcriptional regulator                     | 8.6   |
| 6                                                          | SAV_729          |              | putative LysR-family transcriptional regulator         | 8.8   |
| 7                                                          | SAV_1503         |              | putative TetR-family transcriptional regulator         | 9.4   |
| 8                                                          | SAV_2601         |              | putative PadR-like family transcriptional regulator    | 10.7  |
| 9                                                          | SAV_3053         | <i>catR</i>  | putative hydrogen peroxide sensitive repressor         | 11.8  |
| 10                                                         | SAV_3231         | <i>oxyR</i>  | putative hydrogen peroxide sensing regulator           | 12.7  |
| 11                                                         | SAV_3481         |              | putative two-component system response regulator       | 9     |
| 12                                                         | SAV_3571         |              | putative MarR-family transcriptional regulator         | 9.1   |
| 13                                                         | SAV_3757         |              | putative ArsR-family transcriptional regulator         | 9.1   |
| 14                                                         | SAV_3949         |              | putative regulatory protein                            | 9.4   |
| 15                                                         | SAV_4274         | <i>abaB1</i> | putative LysR-family transcriptional regulator         | 8.8   |
| 16                                                         | SAV_4997         | <i>wblB</i>  | putative WhiB-family transcriptional regulator         | 9.4   |
| 17                                                         | SAV_4999         | <i>sig44</i> | putative RNA polymerase ECF-subfamily sigma factor     | 8.8   |
| 18                                                         | SAV_5042         | <i>whiB</i>  | putative WhiB-family transcriptional regulator         | 8.8   |
| 19                                                         | SAV_5626         |              | putative DNA-binding protein                           | 8.2   |
| 20                                                         | SAV_5653         |              | putative ROK-family transcriptional regulator          | 8.7   |
| 21                                                         | SAV_5792         |              | putative MerR-family transcriptional regulator         | 8.5   |
| 22                                                         | SAV_7041         |              | putative transcriptional regulatory protein            | 9.9   |
| 23                                                         | SAV_7292         | <i>sig56</i> | putative RNA polymerase ECF-subfamily sigma factor     | 8.4   |
| <b>Secondary metabolism (2)</b>                            |                  |              |                                                        |       |
| 24                                                         | SAV_938          | <i>aveA1</i> | type I polyketide synthase AVES 1                      | 14.4  |
| 25                                                         | SAV_2991         | <i>ptlH</i>  | 1-deoxypentalenic acid 11-beta hydroxylase             | 9.4   |
| <b>Metabolism of amino acids and related molecules (6)</b> |                  |              |                                                        |       |
| 26                                                         | SAV_2583         | <i>gabT</i>  | putative 4-aminobutyrate aminotransferase              | 10.1  |
| 27                                                         | SAV_2730         | <i>serA</i>  | putative D-3-phosphoglycerate dehydrogenase            | 8.7   |
| 28                                                         | SAV_2733         | <i>ilvB1</i> | acetolactate synthase subunit large                    | 8.3   |
| 29                                                         | SAV_3325         | <i>hutH1</i> | putative histidine ammonia-lyase                       | 8.4   |
| 30                                                         | SAV_3648         | <i>cysK2</i> | putative cysteine synthase                             | 8     |
| 31                                                         | SAV_6005         | <i>glnA3</i> | putative glutamine synthetase                          | 8.2   |
| <b>Carbohydrate metabolism (13)</b>                        |                  |              |                                                        |       |
| 32                                                         | SAV_564          |              | putative 2-hydroxyhepta-2,4-diene-1,7-dioate isomerase | 8.1   |
| 33                                                         | SAV_628          | <i>agaA1</i> | putative alpha-galactosidase, secreted                 | 8.3   |
| 34                                                         | SAV_828          |              | putative rhamnosidase                                  | 10.4  |
| 35                                                         | SAV_1854         | <i>celA2</i> | putative secreted endo-1,4-beta-glucanase              | 10.8  |
| 36                                                         | SAV_1855         | <i>guxA3</i> | putative secreted cellulose 1,4-beta-cellobiosidase    | 10.8  |
| 37                                                         | SAV_2000         | <i>aceB1</i> | putative malate synthase                               | 11.4  |

|                                                                              |          |              |                                                                     |      |
|------------------------------------------------------------------------------|----------|--------------|---------------------------------------------------------------------|------|
| 38                                                                           | SAV_2159 | <i>amyA2</i> | putative alpha-amylase                                              | 9.2  |
| 39                                                                           | SAV_2427 | <i>citA3</i> | putative citrate synthase                                           | 12   |
| 40                                                                           | SAV_2859 | <i>abpS</i>  | putative cellulose-binding protein                                  | 8    |
| 41                                                                           | SAV_3258 | <i>chiA2</i> | putative chitinase A, secreted                                      | 8.9  |
| 42                                                                           | SAV_3295 |              | putative glycosyltransferase                                        | 9.9  |
| 43                                                                           | SAV_3570 |              | putative trans-aconitate methyltransferase                          | 9.1  |
| 44                                                                           | SAV_6020 | <i>aceE2</i> | putative pyruvate dehydrogenase E1 component                        | 10.2 |
| <b>Fatty acid and lipid metabolism (2)</b>                                   |          |              |                                                                     |      |
| 45                                                                           | SAV_1384 | <i>fadA5</i> | putative acetyl-CoA acetyltransferase                               | 8.2  |
| 46                                                                           | SAV_2856 | <i>fadA1</i> | putative acetyl-CoA acetyltransferase                               | 9.2  |
| <b>Nucleotide metabolism (2)</b>                                             |          |              |                                                                     |      |
| 47                                                                           | SAV_3329 | <i>cyaA</i>  | putative adenylate cyclase                                          | 9.5  |
| 48                                                                           | SAV_4146 | <i>purC</i>  | putative phosphoribosylaminoimidazole-succinocarboxamide synthetase | 9.1  |
| <b>Protein synthesis, folding, and modification (12)</b>                     |          |              |                                                                     |      |
| 49                                                                           | SAV_1956 | <i>map1</i>  | putative methionyl aminopeptidase                                   | 10.2 |
| 50                                                                           | SAV_3994 | <i>pkn8</i>  | putative serine/threonine protein kinase                            | 9.3  |
| 51                                                                           | SAV_4725 | <i>trpS2</i> | putative tryptophanyl-tRNA synthetase                               | 8    |
| 52                                                                           | SAV_4957 | <i>rplM</i>  | putative ribosomal protein L13                                      | 8.4  |
| 53                                                                           | SAV_5155 |              | putative protease, secreted                                         | 8    |
| 54                                                                           | SAV_5300 |              | putative tripeptidyl aminopeptidase, secreted                       | 8.6  |
| 55                                                                           | SAV_5565 | <i>prpK</i>  | putative magnesium or manganese-dependent protein phosphatase       | 8.7  |
| 56                                                                           | SAV_6025 | <i>pepA</i>  | putative leucyl aminopeptidase                                      | 9.7  |
| 57                                                                           | SAV_6799 | <i>pkn30</i> | putative serine/threonine protein kinase                            | 8.5  |
| <b>DNA synthesis, repair, recombination, modification, and packaging (3)</b> |          |              |                                                                     |      |
| 58                                                                           | SAV_6486 |              | putative 3-methyladenine DNA glycosylase                            | 9.3  |
| 59                                                                           | SAV_6714 |              | putative 5'-3' exonuclease                                          | 12.3 |
| 60                                                                           | SAV_7571 | <i>ttrA2</i> | putative helicase                                                   | 9.4  |
| <b>RNA synthesis and modification (1)</b>                                    |          |              |                                                                     |      |
| 61                                                                           | SAV_3892 |              | putative 2'-5' RNA ligase                                           | 8    |
| <b>Membrane bioenergetics (1)</b>                                            |          |              |                                                                     |      |
| 62                                                                           | SAV_1507 | <i>fprB</i>  | putative NAD(P)H-ferredoxin reductase                               | 8.7  |
| <b>Detoxification and adaptation to atypical conditions (8)</b>              |          |              |                                                                     |      |
| 63                                                                           | SAV_1302 | <i>axe1</i>  | putative acetyl xylan esterase                                      | 8.2  |
| 64                                                                           | SAV_1427 | <i>terA</i>  | putative tellurium resistance protein                               | 8.2  |
| 65                                                                           | SAV_2026 | <i>katA3</i> | putative catalase                                                   | 8.5  |
| 66                                                                           | SAV_2966 | <i>lonA</i>  | putative lon class III heat-shock ATP-dependent protease            | 14.8 |
| 67                                                                           | SAV_3052 | <i>katA1</i> | putative catalase                                                   | 11.8 |
| 68                                                                           | SAV_3232 | <i>ahpC</i>  | putative alkyl hydroperoxide reductase                              | 12.7 |
| 69                                                                           | SAV_4154 | <i>cspD3</i> | putative cold shock protein                                         | 8.7  |
| 70                                                                           | SAV_4484 | <i>dnaK1</i> | putative heat shock protein Hsp70                                   | 17.4 |
| 71                                                                           | SAV_4514 | <i>clpB1</i> | putative ATP-dependent Clp protease                                 | 17.2 |
| 72                                                                           | SAV_6608 | <i>pacB3</i> | putative penicillin acylase, secreted                               | 9.6  |

|                                                          |                 |               |                                                            |      |
|----------------------------------------------------------|-----------------|---------------|------------------------------------------------------------|------|
| <u>73</u>                                                | <i>SAV_7241</i> | <i>clpB2</i>  | putative ATP-dependent Clp protease                        | 12.1 |
| <b>Cell wall and cell envelope (3)</b>                   |                 |               |                                                            |      |
| 74                                                       | <i>SAV_3393</i> | <i>nagZ2</i>  | putative beta-N-acetylhexosaminidase, secreted             | 8.7  |
| 75                                                       | <i>SAV_5302</i> | <i>nagZ5</i>  | putative beta-N-acetylhexosaminidase, secreted             | 10   |
| 76                                                       | <i>SAV_5913</i> | <i>dacF</i>   | putative D-alanyl-D-alanine carboxypeptidase               | 9    |
| <b>Cell division and differentiation (1)</b>             |                 |               |                                                            |      |
| <u>77</u>                                                | <i>SAV_4666</i> | <i>ftsH</i>   | putative cell division protein FtsH                        | 9.6  |
| <b>Transport/binding proteins and lipoproteins (16)</b>  |                 |               |                                                            |      |
| 78                                                       | <i>SAV_1133</i> |               | putative membrane transport protein                        | 8    |
| 79                                                       | <i>SAV_1338</i> | <i>ssuA1</i>  | putative ABC transporter substrate-binding protein         | 9.6  |
| 80                                                       | <i>SAV_2185</i> |               | putative ABC transporter ATP-binding protein               | 9.3  |
| 81                                                       | <i>SAV_2603</i> |               | putative multi-drug efflux transporter                     | 8.3  |
| 82                                                       | <i>SAV_2657</i> | <i>araE</i>   | putative L-arabinose permease                              | 12.1 |
| 83                                                       | <i>SAV_2769</i> | <i>oppC1</i>  | putative peptide ABC transporter permease protein          | 9    |
| 84                                                       | <i>SAV_3149</i> | <i>oppA4</i>  | putative peptide ABC transporter substrate-binding protein | 9.8  |
| 85                                                       | <i>SAV_3150</i> | <i>bldKA1</i> | putative peptide ABC transporter permease protein          | 9.8  |
| 86                                                       | <i>SAV_3482</i> |               | putative di-tripeptide transporter                         | 9    |
| 87                                                       | <i>SAV_3897</i> | <i>pbuG1</i>  | putative hypoxanthine/guanine permease                     | 8.1  |
| 88                                                       | <i>SAV_4053</i> |               | putative ABC transporter ATP-binding protein               | 9.1  |
| 89                                                       | <i>SAV_5783</i> |               | putative lipoprotein                                       | 8    |
| 90                                                       | <i>SAV_5912</i> |               | putative ABC transporter permease protein                  | 9    |
| 91                                                       | <i>SAV_6715</i> | <i>opuAA</i>  | putative glycine betaine ABC transport ATP-binding protein | 12.3 |
| 92                                                       | <i>SAV_7200</i> | <i>glpF3</i>  | putative glycerol uptake facilitator protein               | 9.5  |
| 93                                                       | <i>SAV_7293</i> |               | putative lipoprotein, secreted                             | 8.4  |
| <b>Mobile and extrachromosomal element functions (2)</b> |                 |               |                                                            |      |
| 94                                                       | <i>SAV_3722</i> |               | putative IS701 family ISAzvi8-like transposase             | 8.7  |
| 95                                                       | <i>SAV_7558</i> |               | putative IS5 family IS493-like transposase                 | 8.3  |
| <b>Unknown or unclassified genes (60)</b>                |                 |               |                                                            |      |
| 96                                                       | <i>SAV_105</i>  |               | hypothetical protein                                       | 9.1  |
| 97                                                       | <i>SAV_197</i>  |               | hypothetical protein                                       | 9.5  |
| 98                                                       | <i>SAV_267</i>  |               | hypothetical protein                                       | 8    |
| 99                                                       | <i>SAV_293</i>  |               | putative oxidoreductase                                    | 8.2  |
| 100                                                      | <i>SAV_500</i>  |               | hypothetical protein                                       | 8.5  |
| 101                                                      | <i>SAV_550</i>  |               | hypothetical protein                                       | 14.1 |
| 102                                                      | <i>SAV_553</i>  |               | hypothetical protein                                       | 14.1 |
| 103                                                      | <i>SAV_622</i>  |               | hypothetical protein                                       | 8.9  |
| 104                                                      | <i>SAV_804</i>  |               | putative secreted protein                                  | 8.5  |
| 105                                                      | <i>SAV_812</i>  |               | putative small hydrophilic protein                         | 8    |
| 106                                                      | <i>SAV_872</i>  |               | putative oxidoreductase                                    | 8.1  |
| 107                                                      | <i>SAV_903</i>  |               | putative membrane protein                                  | 9.3  |
| 108                                                      | <i>SAV_1201</i> |               | putative dehydrogenase                                     | 10.8 |
| 109                                                      | <i>SAV_1428</i> |               | hypothetical protein                                       | 8.2  |
| 110                                                      | <i>SAV_1478</i> |               | hypothetical protein                                       | 9.4  |
| 111                                                      | <i>SAV_1506</i> |               | hypothetical protein                                       | 8.7  |

|     |                 |                                    |      |
|-----|-----------------|------------------------------------|------|
| 112 | <i>SAV_1950</i> | putative hydrolase                 | 10.9 |
| 113 | <i>SAV_2075</i> | putative transmembrane protein     | 10.7 |
| 114 | <i>SAV_2158</i> | hypothetical protein               | 9.2  |
| 115 | <i>SAV_2452</i> | hypothetical protein               | 8.1  |
| 116 | <i>SAV_2582</i> | putative ATP/GTP-binding protein   | 10.1 |
| 117 | <i>SAV_2599</i> | hypothetical protein               | 9.7  |
| 118 | <i>SAV_2604</i> | putative secreted protein          | 8.3  |
| 119 | <i>SAV_2706</i> | hypothetical protein               | 9    |
| 120 | <i>SAV_3104</i> | hypothetical protein               | 8.6  |
| 121 | <i>SAV_3239</i> | hypothetical protein               | 10   |
| 122 | <i>SAV_3257</i> | hypothetical protein               | 8.9  |
| 123 | <i>SAV_3333</i> | putative secreted protein          | 10   |
| 124 | <i>SAV_3394</i> | hypothetical protein               | 8.7  |
| 125 | <i>SAV_3717</i> | hypothetical protein               | 8.4  |
| 126 | <i>SAV_3748</i> | hypothetical protein               | 9.4  |
| 127 | <i>SAV_3758</i> | hypothetical protein               | 9.1  |
| 128 | <i>SAV_3898</i> | putative integral membrane protein | 8.1  |
| 129 | <i>SAV_3916</i> | putative secreted protein          | 8.1  |
| 130 | <i>SAV_4404</i> | hypothetical protein               | 13.3 |
| 131 | <i>SAV_4490</i> | hypothetical protein               | 8.9  |
| 132 | <i>SAV_4513</i> | hypothetical protein               | 17.2 |
| 133 | <i>SAV_4578</i> | hypothetical protein               | 8.8  |
| 134 | <i>SAV_4627</i> | putative secreted protein          | 8.2  |
| 135 | <i>SAV_4632</i> | hypothetical protein               | 8.6  |
| 136 | <i>SAV_4870</i> | hypothetical protein               | 9.1  |
| 137 | <i>SAV_4956</i> | hypothetical protein               | 8.4  |
| 138 | <i>SAV_5154</i> | putative secreted protein          | 8    |
| 139 | <i>SAV_5191</i> | putative membrane protein          | 11.8 |
| 140 | <i>SAV_5198</i> | hypothetical protein               | 8.9  |
| 141 | <i>SAV_5215</i> | hypothetical protein               | 8.7  |
| 142 | <i>SAV_5325</i> | hypothetical protein               | 10.3 |
| 143 | <i>SAV_5347</i> | putative secreted protein          | 8.5  |
| 144 | <i>SAV_5627</i> | hypothetical protein               | 8.2  |
| 145 | <i>SAV_5652</i> | hypothetical protein               | 8.7  |
| 146 | <i>SAV_5751</i> | hypothetical protein               | 13   |
| 147 | <i>SAV_5772</i> | putative dehydratase               | 9.1  |
| 148 | <i>SAV_5784</i> | hypothetical protein               | 8    |
| 149 | <i>SAV_5816</i> | putative secreted protein          | 9.4  |
| 150 | <i>SAV_5955</i> | hypothetical protein               | 9.4  |
| 151 | <i>SAV_5964</i> | hypothetical protein               | 8.1  |
| 152 | <i>SAV_5990</i> | putative secreted protein          | 8.2  |
| 153 | <i>SAV_6246</i> | putative secreted protein          | 11.3 |
| 154 | <i>SAV_6597</i> | putative secreted protein          | 9.2  |
| 155 | <i>SAV_6946</i> | putative choline oxidase           | 8.1  |

**Total: 155**

---

Underlining: putative targets confirmed by EMSAs to be bound by HspR.

Shading: putative targets confirmed by EMSAs to be not bound by HspR.
